# Supplementary material for: Circulating levels of asprosin and its association with insulin resistance and renal function in type2 diabetes mellitus and diabetic nephropathy patients
Source: Research Square preprint supplement (doi:10.21203/rs.3.rs-448826/v1), 2021-05-05
Supplement: Supplementary file 1 [file f0c919c3f1a172d6225a141d.docx]

Dear Editor

### Please find enclosed a manuscript entitled “Circulating levels of asprosin and its association with insulin resistance and renal function in patients with type2 diabetes mellitus and diabetic nephropathy” for consideration for publication in our interested journal (Molecular Biology Reports*)*. We believe this manuscript is appropriate for publication in this journal because it provides valuable knowledge about the Circulation levels of Asprosin in the type 2 and diabetic nephropathy patients , in the present study for the first time we have assesed the serum levels of Asprosin as a new adipokine in diabetic nephropathy patients and its relationship with insulin resistance and renal function factors. Furthermore, it is suggested that asprosin can be used as a diagnostic factor for diabetic nephropathy patients with controls.

### The data included in this manuscript have not been published previously and are not under consideration by other journals. All authors have been participated in the preparation of the manuscript, and have given their agreement to submit this manuscript with the present format. Authors declare no conflict of interest.

###

Sincerely yours

J. Hossieni, M.D, **(Jhosseinee@gmail.com)**

N. Moradi, Ph.D, **(**[**Nariman.Moradi@muk.ac.ir**](mailto:Nariman.Moradi@muk.ac.ir)**) , +989183736537**
